# Supplementary material for: Analysis of crystal-field effect on luminescence spectra of Mn4+ (3d3) ion-doped double perovskite La2ZnTiO6 phosphor by semiempirical computations: exchange charge model and superposition model
Source: Royal Society of Chemistry journal article supplement (doi:10.1039/d2tc00407k), 2022-01-01
Supplement: d2tc00407k1.pdf [file d2tc00407k1.pdf]

Supplementary E-File

**Analysis of crystal-field effect on luminescence spectra of Mn<sup>4+</sup> (3d<sup>3</sup>) ion doped double perovskite La<sub>2</sub>ZnTiO<sub>6</sub> phosphor by semiempirical computations: exchange charge model and superposition model**

A. Biswas,<sup>a</sup> S. Sarkar,<sup>a</sup> Y.M. Jana,<sup>\*a</sup> D. Swarnakar,<sup>a</sup> S. Nandi,<sup>a</sup> C. Rudowicz,<sup>\*b</sup> M. Açıkgöz<sup>c</sup> and N.M. Avram<sup>de</sup>

<sup>a</sup> Department of Physics, University of Kalyani, Kalyani -741235, Nadia, W.B., India

<sup>b</sup> Faculty of Chemistry, A. Mickiewicz University, 61-614 Poznań, Poland

<sup>c</sup> Department of Science, The State University of New York (SUNY) Maritime College, New York 10465, USA

<sup>d</sup> West University of Timisoara, Department of Physics, Bd. V. Parvan 4, Timisoara 300223, Romania

<sup>e</sup> Academy of Romanian Scientists, Independentei 54, 050094-Bucharest, Romania

Table S1 Structural parameters of pure La<sub>2</sub>ZnTiO<sub>6</sub> and doped La<sub>2</sub>ZnTiO<sub>6</sub>:Mn<sup>4+</sup> compounds.

| System Ref.                | La <sub>2</sub> ZnTiO <sub>6</sub> [33] | La <sub>2</sub> ZnTiO <sub>6</sub> [34] | La <sub>2</sub> ZnTiO <sub>6</sub> :Mn <sup>4+</sup> [14] |
|----------------------------|-----------------------------------------|-----------------------------------------|-----------------------------------------------------------|
| <i>a</i> (Å)               | 7.89497                                 | 7.8975                                  | 7.89042                                                   |
| <i>b</i> (Å)               | 5.5964                                  | 5.6172                                  | 5.60145                                                   |
| <i>c</i> (Å)               | 5.58089                                 | 5.578                                   | 5.57979                                                   |
| <i>β</i> (°)               | 90.034                                  | 89.973                                  | 90.063                                                    |
| <i>V</i> (Å <sup>3</sup> ) | 246.584                                 | 247.451                                 | 246.614                                                   |

Table S2 Atomic coordinates, metal-ligand bond distances (Å) and bond angles (°) of pure La<sub>2</sub>ZnTiO<sub>6</sub>.

| System Ref.                   | La <sub>2</sub> ZnTiO <sub>6</sub> [33] | La <sub>2</sub> ZnTiO <sub>6</sub> [34] |
|-------------------------------|-----------------------------------------|-----------------------------------------|
| La (site 4e: C <sub>1</sub> ) |                                         |                                         |
| x                             | 0.25                                    | 0.2499                                  |
| y                             | 0.033                                   | 0.0361                                  |
| z                             | 0.9933                                  | 0.0076                                  |
| Zn (2c : C <sub>i</sub> )     |                                         |                                         |
| x                             | 0                                       | 0                                       |
| y                             | 0.5                                     | 0.5                                     |
| z                             | 0                                       | 0                                       |
| Ti (2b : C <sub>i</sub> )     |                                         |                                         |
| x                             | 0                                       | 0                                       |
| y                             | 0                                       | 0                                       |
| z                             | 0.5                                     | 0.5                                     |
| O1 (site 4e: C <sub>1</sub> ) |                                         |                                         |
| x                             | 0.9605                                  | 0.043                                   |
| y                             | 0.2059                                  | 0.2832                                  |
| z                             | 0.2234                                  | 0.2995                                  |
| O2 (site 4e: C <sub>1</sub> ) |                                         |                                         |
| x                             | 0.9593                                  | 0.0394                                  |
| y                             | 0.7211                                  | 0.7952                                  |
| z                             | 0.2971                                  | 0.223                                   |
| O3 (site 4e: C <sub>1</sub> ) |                                         |                                         |
| x                             | 0.2415                                  | 0.2448                                  |
| y                             | 0.9837                                  | 0.9814                                  |
| z                             | 0.4244                                  | 0.5794                                  |
| Bond lengths                  |                                         |                                         |
| Ti–O(1)                       | 1.9513                                  | 1.9512                                  |

|              |         |         |
|--------------|---------|---------|
| Ti–O(2)      | 1.9548  | 1.9739  |
| Ti–O(3)      | 1.9576  | 1.9863  |
| O(3)–Ti–O(2) | 90.3193 | 90.087  |
| O(3)–Ti–O(2) | 89.6807 | 89.9131 |
| O(3)–Ti–O(1) | 89.5574 | 90.5338 |
| O(3)–Ti–O(1) | 90.4426 | 89.4662 |
| O(2)–Ti–O(1) | 89.2616 | 90.0482 |
| O(2)–Ti–O(1) | 90.7384 | 89.9519 |
| Zn–O(1)      | 2.0883  | 2.095   |
| Zn–O(2)      | 2.0938  | 2.096   |
| Zn–O(3)      | 2.088   | 2.066   |
| <i>La–O</i>  | 2.4116  | 2.4087  |
|              | 2.4403  | 2.4191  |
|              | 2.4517  | 2.4568  |
|              | 2.5662  | 2.5484  |
|              | 2.6772  | 2.6734  |
|              | 2.6919  | 2.6916  |
|              | 2.782   | 2.7885  |
|              | 2.795   | 2.781   |

Table S3 Comparative listing of the SPM intrinsic parameters,  $\overline{B}_k$ , and the respective exchange contributions (defined in text), calculated using the structural data [33,34] (all values are in  $\text{cm}^{-1}$ ).

| SPM                                   | [33]  | [34]  |
|---------------------------------------|-------|-------|
| $\overline{B}_2$                      | 20250 | 29550 |
| $\overline{B}_2^S$                    | 10805 | 21350 |
| $\overline{B}_4$                      | 13468 | 13394 |
| $\overline{B}_4^S$                    | 11870 | 11858 |
| $\overline{B}_2 / \overline{B}_4$     | 1.5   | 2.21  |
| $\overline{B}_2^S / \overline{B}_4^S$ | 0.91  | 1.8   |
